# Supplementary material for: Comparative Studies of Carbon Materials Synthesized From Waste as Catalysts for Ozonation of Real Textile Wastewater
Source: Research Square preprint supplement (doi:10.21203/rs.3.rs-881195/v1), 2021-10-01
Supplement: Supplementary file 1 [file 75e6e81b79f019c812ee5708.docx]

Rct

OH Exposure

HPLC

*p*-CBA

Ozonation of Textile wastewater

Ozone saturated DM Water

T T Wastewater+ AC/MWCNT

Ozone Generator
